# Supplementary material
Source: PubMed Central journal article supplement (PMC4130801)
Supplement: NIHMS556840-supplement-01.pdf [file NIHMS556840-supplement-01.pdf]

## SUPPLEMENTARY MATERIAL

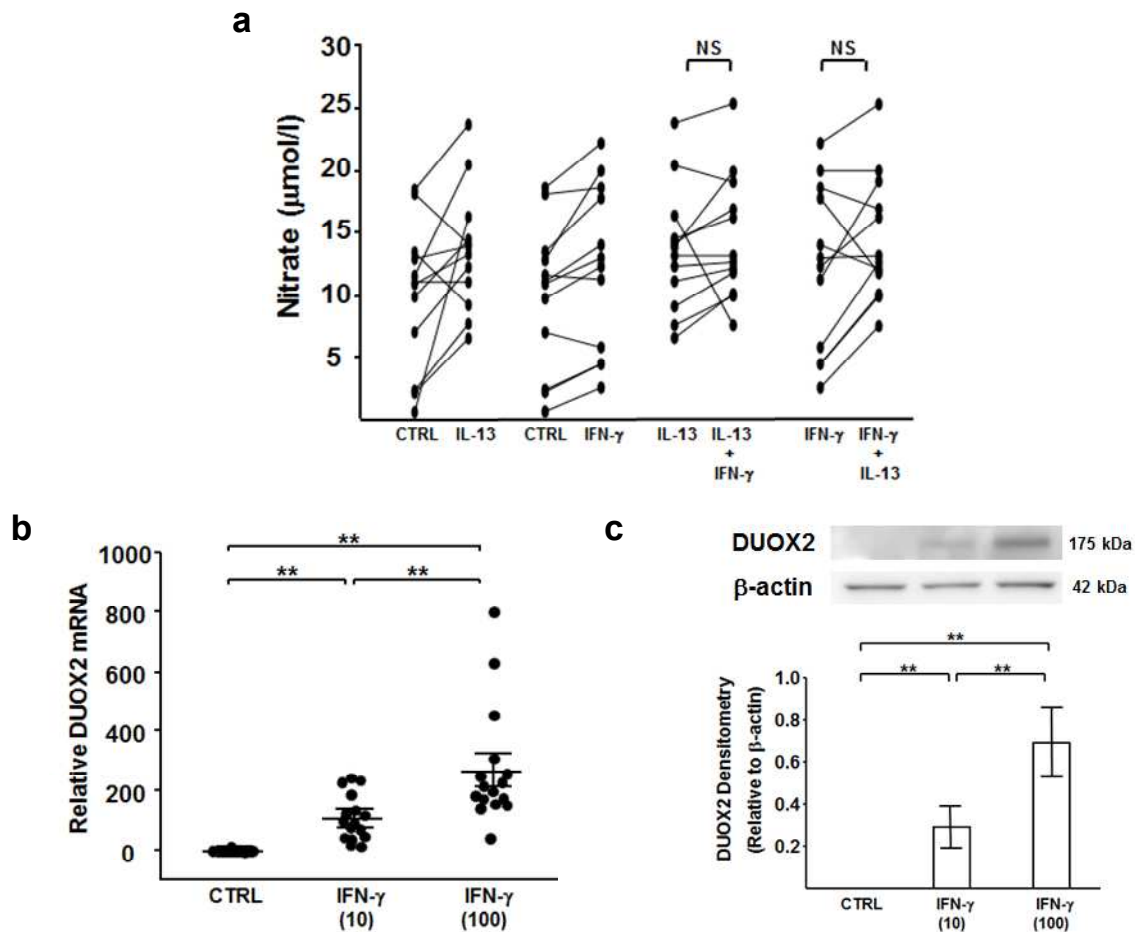

**Supplementary Figure 1** Nitrate levels and DUOX2 expression in HAEC. ALI-cultured cells were treated with IL-13 (1 ng/ml) or media for 8 d, with/without exposure to IFN- $\gamma$  for final 72 h. mRNA was harvested for real-time PCR. Total proteins were harvested for Western blot analysis. Nitrate levels were measured in the lower supernatants. **(a)** Unlike nitrite, nitrate did not increase with the combination of low-dose IL-13 (1 ng/ml) and IFN- $\gamma$  (10 ng/ml).  $n=12$ . NS, not significant. **(b and c)** IFN- $\gamma$  dose-dependently increased DUOX2 mRNA and protein. Overall  $P<0.01$ ,  $**P<0.001$ . Densitometry values were shown as mean $\pm$ SEM.

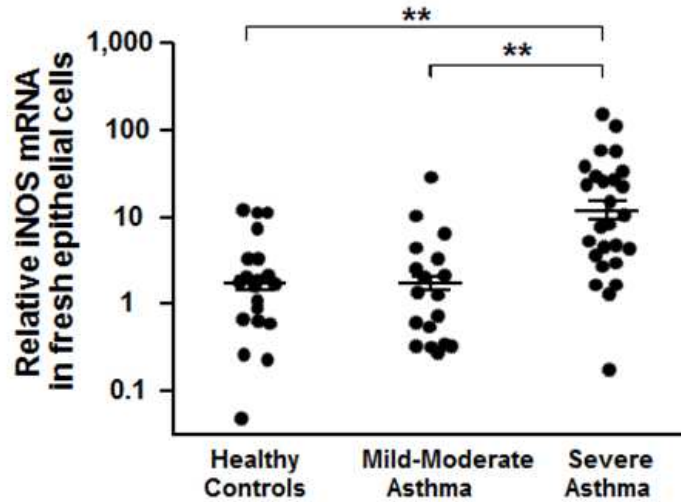

**Supplementary Figure 2** iNOS expression in fresh epithelial cells. Expression of iNOS mRNA was increased in fresh bronchial epithelial cells from SA compared to MMA and NC. Overall  $P < 0.001$ ,  $**P < 0.001$ . Values were mean  $\pm$  SEM.

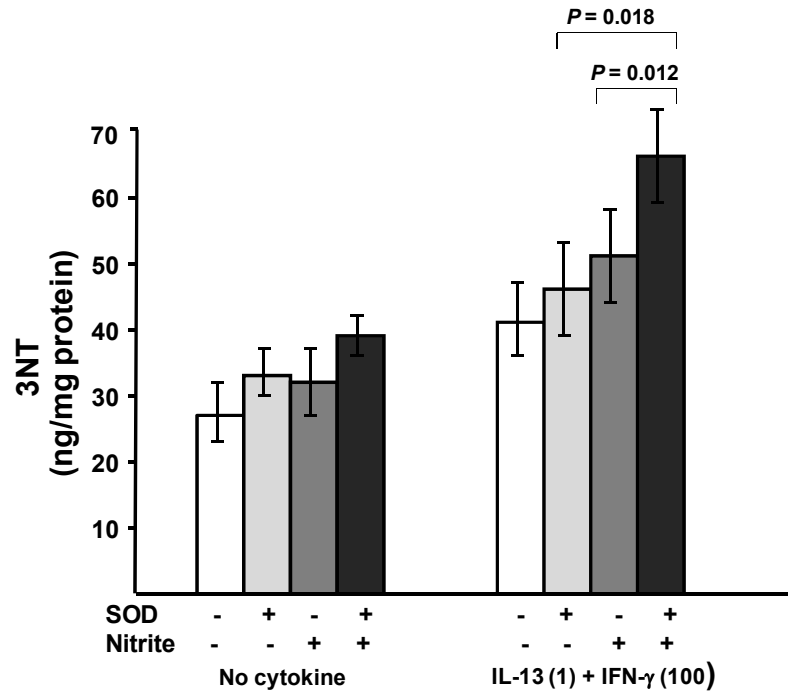

**Supplementary Figure 3** 3NT expression in the presence of SOD and nitrite. ALI-cultured cells were treated with low-dose IL-13 (1 ng/ml) or media for 8 d, with/without exposure to IFN- $\gamma$  (100 ng/ml) for the last 72 h. At day 8, culture medium from the apical chamber was removed, and 100  $\mu$ l PBS with/without one of the following was added: SOD (150 U/ml), nitrite (25  $\mu$ M), or the combination of SOD and nitrite. After 1-h incubation, cell lysates were harvested for 3NT measurement. In the presence of IL-13 and IFN- $\gamma$ , the combination of SOD and nitrite enhanced 3NT expression more than either SOD alone ( $P = 0.018$ , two-tailed paired t-test,  $n = 3$ ) or nitrite alone ( $P = 0.012$ ). Values are presented as mean+SEM.

**Supplementary Table 1.** Demographics of subjects in TPO microarray experiments ( $n = 108$ )

|                           | <b>Normal control<br/>(<math>n = 20</math>)</b> | <b>Mild-Moderate asthma<br/>(<math>n = 50</math>)</b> | <b>Severe asthma<br/>(<math>n = 38</math>)</b> |
|---------------------------|-------------------------------------------------|-------------------------------------------------------|------------------------------------------------|
| Female gender             | 11 (55%)                                        | 35 (70%)                                              | 28 (74%)                                       |
| Age (years)               | 33.2 $\pm$ 13.1                                 | 33.0 $\pm$ 11.4                                       | 44.4 $\pm$ 10.1*                               |
| Race (Caucasian/AA/other) | 14/3/3                                          | 29/14/7                                               | 22/14/2                                        |
| BMI                       | 25.1 $\pm$ 5.1                                  | 29.6 $\pm$ 6.7*                                       | 31.9 $\pm$ 6.5*                                |
| Baseline FEV <sub>1</sub> | 94.9 $\pm$ 9.0                                  | 83.8 $\pm$ 15.5*                                      | 57.3 $\pm$ 21.5*                               |
| Baseline FVC              | 97.2 $\pm$ 12.0                                 | 91.2 $\pm$ 14.6                                       | 73.2 $\pm$ 19.0*                               |

\* $P < 0.05$  versus Normal control. AA, African American; FEV<sub>1</sub>, forced expiratory volume in 1 second; FVC, forced vital capacity.
